# Supplementary material for: Chemical Composition and Biological Properties of Two Jatropha Species: Different Parts and Different Extraction Methods
Source: MDPI journal article supplement (doi:10.3390/antiox10050792), 2021-05-17
Supplement: s1 [file s1]

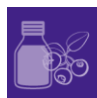

Article

# Chemical composition and biological properties of two *Jatropha* species: Different parts and different extraction methods

Gokhan Zengin<sup>1</sup>, Mohamad Fawzi Mahomoodally<sup>2</sup>, Kouadio Ibrahime Sinan<sup>1</sup>, Gunes Ak<sup>1</sup>, Ouattara Katinan Etienne<sup>3</sup>, Jugreet B. Sharmeen<sup>2</sup>, Luigi Brunetti<sup>4</sup>, Sheila Leone<sup>4</sup>, Simonetta Cristina Di Simone<sup>4</sup>, Lucia Recinella<sup>4</sup>, Annalisa Chiavaroli<sup>4</sup>, Luigi Menghini<sup>4</sup>, Giustino Orlando<sup>4\*</sup>, József Jekő<sup>5</sup>, Zoltán Cziáky<sup>5</sup>, Claudio Ferrante<sup>4</sup>

<sup>1</sup>Physiology and Biochemistry Research Laboratory, Department of Biology, Science Faculty, Selcuk University, Campus, 42130 Konya, Turkey. gokhanzengin@selcuk.edu.tr (G.Z), sinankouadio@gmail.com (K.I.S) and akguneselcuk@gmail.com

<sup>2</sup>Department of Health Sciences, Faculty of Medicine and Health Sciences, University of Mauritius, 230 Réduit, Mauritius. f.mahomoodally@uom.ac.mu (M.F.M) and sharmeenjugs@gmail.com (J.B.S)

<sup>3</sup>Laboratoire de Botanique, UFR Biosciences, Université Félix Houphouët-Boigny, 00225 Abidjan, Côte d'Ivoire. katinan.etienne@gmail.com (O.K.E)

<sup>4</sup>Department of Pharmacy, Medicinal Plant Unit (MPU), Botanic Garden "Giardino dei Semplici", "G. d'Annunzio" University of Chieti-Pescara, Via dei Vestini, 66100 Chieti, Italy; luigi.brunetti@unich.it (L.B.); sheila.leone@unich.it (S.L.); disimonesimonetta@gmail.com (S.C.D.S.); lucia.recinella@unich.it (L.R.); annalisa.chiavaroli@unich.it (A.C.); luigi.menghini@unich.it (L.M.); giustino.orlando@unich.it (G.O.); claudio.ferrante@unich.it (C.F.);

<sup>5</sup>Agricultural and Molecular Research and Service Institute, University of Nyíregyháza, 4400 Nyíregyháza, Hungary cziaky.zoltan@nye.hu (Z.C.) and jjozsi@gmail.com (J.J).

\* Correspondence: gokhanzengin@selcuk.edu.tr (G.Z); giustino.orlando@unich.it (G.O.)

**Table S1.** Chemical composition of *J. curcas* leaves (HAE).

| No.             | Name                                            | Formula   | Rt    | [M + H] <sup>+</sup> | [M - H] <sup>-</sup> | Fragment 1 | Fragment 2 | Fragment 3 | Fragment 4 | Fragment 5 | Literature |
|-----------------|-------------------------------------------------|-----------|-------|----------------------|----------------------|------------|------------|------------|------------|------------|------------|
| 1 <sup>1</sup>  | Catechin                                        | C15H14O6  | 14.17 | 289.07121            | 245.0821             | 205.0504   | 203.0709   | 151.0389   | 109.0282   |            |            |
| 2               | Kynurenic acid                                  | C10H7NO3  | 14.23 | 190.05042            |                      | 162.0552   | 144.0451   | 116.0498   | 89.0393    |            |            |
| 3               | Bergenin                                        | C14H16O9  | 14.52 | 327.07161            | 312.0496             | 249.0400   | 234.0166   | 207.0293   | 192.0059   |            |            |
| 4               | Scopoletin-7-O-hexoside                         | C16H18O9  | 15.02 | 355.10291            |                      | 193.0499   | 178.0263   | 165.0555   | 137.0598   | 133.0289   |            |
| 5 <sup>1</sup>  | Epiatechin                                      | C15H14O6  | 17.61 | 289.07121            | 245.0819             | 205.0501   | 203.0707   | 151.0386   | 109.0282   |            |            |
| 6               | Fraxetin (7,8-Dihydroxy-6-methoxycoumarin)      | C10H8O5   | 17.68 | 209.04500            |                      | 194.0215   | 181.0499   | 163.0393   | 149.0963   | 135.0443   |            |
| 7               | Tomenin or isomer                               | C17H20O10 | 18.38 | 385.11348            |                      | 223.0603   | 208.0370   | 190.0263   | 162.0313   |            |            |
| 8 <sup>1</sup>  | Scopoletin (7-Hydroxy-6-methoxycoumarin)        | C10H8O4   | 19.16 | 193.05009            |                      | 178.0263   | 165.0546   | 149.0599   | 137.0602   | 133.0287   |            |
| 9               | Hemiphloin (Naringenin-6-C-glucoside)           | C21H22O10 | 19.84 | 435.12913            |                      | 399.1081   | 339.0866   | 285.0757   | 219.0292   | 195.0292   |            |
| 10              | Luteolin-C-hexoside-C-pentoside isomer 1        | C26H28O15 | 19.87 |                      | 579.13500            | 489.1039   | 459.0942   | 399.0723   | 369.0620   | 339.0513   |            |
| 11 <sup>1</sup> | Taxifolin (Dihydroquercetin)                    | C15H12O7  | 19.92 | 303.05048            | 285.0408             | 199.0392   | 177.0180   | 151.0389   | 125.0231   |            |            |
| 12              | Luteolin-C-hexoside-C-pentoside isomer 2        | C26H28O15 | 20.03 |                      | 579.13500            | 489.1031   | 459.0969   | 399.0726   | 369.0620   | 339.0521   |            |
| 13              | Loliolide                                       | C11H16O3  | 20.12 | 197.11777            |                      | 179.1068   | 161.0962   | 135.1171   | 133.1015   | 107.0860   |            |
| 14              | Apigenin-C-hexoside-O-hexoside                  | C27H30O15 | 20.29 | 595.16630            |                      | 433.1132   | 415.1028   | 337.0708   | 313.0708   | 283.0602   |            |
| 15              | Isohemiphloin (Naringenin-8-C-glucoside)        | C21H22O10 | 20.39 | 435.12913            |                      | 399.1088   | 339.0864   | 285.0759   | 219.0290   | 195.0292   |            |
| 16 <sup>1</sup> | Coumarin                                        | C9H6O2    | 20.55 | 147.04461            |                      | 119.0688   | 105.0704   | 103.0548   | 91.0548    |            |            |
| 17              | Naringenin-C-hexoside isomer 3                  | C21H22O10 | 20.71 | 435.12913            |                      | 417.1179   | 399.1062   | 315.0861   | 219.0285   | 195.0292   |            |
| 18              | N-(2-Phenylethyl)acetamide                      | C10H13NO  | 20.76 | 164.10754            |                      | 122.0968   | 105.0704   | 103.0550   | 90.9483    | 79.0550    |            |
| 19              | Vicenin-1 (Apigenin-8-C-glucoside-6-C-xyloside) | C26H28O14 | 20.77 | 565.15574            |                      | 547.1452   | 529.1349   | 511.1242   | 427.1029   | 295.0605   |            |
| 20              | Orientin (Luteolin-8-C-glucoside)               | C21H20O11 | 20.90 | 449.10839            |                      | 431.0978   | 413.0870   | 353.0656   | 329.0658   | 299.0553   | [26]       |
| 21              | Vicenin-3 (Apigenin-6-C-glucoside-8-C-xyloside) | C26H28O14 | 21.15 | 565.15574            |                      | 547.1456   | 529.1346   | 511.1232   | 379.0816   | 295.0605   |            |

|                 |                                                                                 |           |       |           |          |          |          |          |          |      |
|-----------------|---------------------------------------------------------------------------------|-----------|-------|-----------|----------|----------|----------|----------|----------|------|
| 22              | Isoorientin (Luteolin-6-C-glucoside)                                            | C21H20O11 | 21.25 | 449.10839 | 431.0978 | 413.0873 | 353.0660 | 329.0658 | 299.0554 |      |
| 23 <sup>1</sup> | Vitexin (Apigenin-8-C-glucoside)                                                | C21H20O10 | 21.86 | 433.11347 | 415.1030 | 397.0924 | 379.0815 | 313.0709 | 283.0604 | [26] |
| 24              | Tomentin (6,7-Dimethoxy-5-hydroxycoumarin) or isomer                            | C11H10O5  | 22.22 | 223.06065 | 208.0367 | 190.0263 | 179.0338 | 162.0312 | 135.0443 |      |
| 25              | Isovitexin (Apigenin-6-C-glucoside)                                             | C21H20O10 | 22.77 | 433.11347 | 415.1025 | 397.0920 | 337.0708 | 313.0708 | 283.0602 |      |
| 26              | Scoparin (Chrysoeriol-8-C-glucoside) or Isoscoparin (Chrysoeriol-6-C-glucoside) | C22H22O11 | 23.18 | 463.12404 | 445.1133 | 427.1027 | 367.0815 | 343.0815 | 313.0708 |      |
| 27 <sup>1</sup> | Isoquercitrin (Quercetin-3-O-glucoside)                                         | C21H20O12 | 23.44 | 463.08765 | 301.0359 | 300.0280 | 271.0253 | 255.0302 | 178.9975 |      |
| 28              | Apigenin-C-pentoside isomer 1                                                   | C20H18O9  | 24.24 | 403.10291 | 385.0920 | 367.0815 | 349.0712 | 313.0710 | 283.0602 |      |
| 29 <sup>1</sup> | Cosmosiin (Apigenin-7-O-glucoside)                                              | C21H20O10 | 24.51 | 433.11347 | 271.0602 | 153.0179 | 145.0283 | 119.0491 |          |      |
| 30              | Apigenin-C-pentoside isomer 2                                                   | C20H18O9  | 24.82 | 403.10291 | 385.0934 | 367.0814 | 337.0718 | 313.0709 | 283.0603 |      |
| 31              | Rhoifolin (Apigenin-7-O-neohesperidoside)                                       | C27H30O14 | 24.93 | 577.15574 | 413.0882 | 269.0460 | 268.0382 | 117.0334 | 107.0125 | [26] |
| 32              | N-trans-Feruloyltyramine                                                        | C18H19NO  | 25.15 | 314.13924 | 177.0548 | 149.0598 | 145.0286 | 121.0651 | 103.0547 |      |
| 33 <sup>1</sup> | Eriodictyol (3',4',5,7-Tetrahydroxyflavanone)                                   | C15H12O6  | 25.40 | 287.05556 | 151.0027 | 135.0441 | 125.0231 | 107.0125 | 83.0123  |      |
| 34              | Dihydroactinidiolide                                                            | C11H16O2  | 27.08 | 181.12286 | 163.1119 | 145.1014 | 135.1172 | 121.1015 | 107.0861 |      |
| 35              | Dihydroxy-dimethoxy(iso)flavone-C-hexoside                                      | C23H24O11 | 27.31 | 477.13969 | 445.1138 | 427.1029 | 409.0922 | 325.0708 | 295.0604 |      |
| 36 <sup>1</sup> | Quercetin (3,3',4',5,7-Pentahydroxyflavone)                                     | C15H10O7  | 27.55 | 301.03483 | 273.0402 | 178.9976 | 151.0025 | 121.0278 | 107.0129 |      |
| 37 <sup>1</sup> | Naringenin (4',5,7-Trihydroxyflavanone)                                         | C15H12O5  | 27.73 | 271.06065 | 177.0200 | 165.0181 | 151.0026 | 119.0489 | 107.0126 |      |
| 38              | Jasmonic acid                                                                   | C12H18O3  | 28.19 | 209.11777 | 165.1275 | 109.0643 | 59.0123  |          |          |      |
| 39              | Jatrophanol I or II or II                                                       | C43H40O20 | 28.28 | 875.20347 | 443.0987 | 431.0981 | 323.0567 | 311.0562 | 295.0613 | [26] |
| 40 <sup>1</sup> | Luteolin (3',4',5,7-Tetrahydroxyflavone)                                        | C15H10O6  | 28.43 | 285.03991 | 217.0503 | 199.0394 | 175.0394 | 151.0026 | 133.0283 |      |
| 41              | Sebacic acid (Decanedioic acid)                                                 | C10H18O4  | 28.44 | 201.11268 | 183.1021 | 157.1222 | 139.1118 | 137.0963 | 111.0801 |      |
| 42              | Quercetin-3-O-methyl ether                                                      | C16H12O7  | 28.78 | 315.05048 | 300.0280 | 271.0253 | 255.0300 | 243.0301 |          |      |
| 43              | Apigenin-C-pentoside isomer 3                                                   | C20H18O9  | 29.40 | 403.10291 | 385.0919 | 367.0816 | 337.0709 | 313.0710 | 283.0602 |      |
| 44 <sup>1</sup> | Apigenin (4',5,7-Trihydroxyflavone)                                             | C15H10O5  | 30.26 | 269.04500 | 227.0344 | 225.0554 | 151.0026 | 149.0234 | 117.0331 | [26] |
| 45              | Jatrophanol I or II or II                                                       | C43H40O20 | 30.28 | 875.20347 | 713.1809 | 443.0987 | 431.0986 | 323.0568 | 311.0559 | [26] |

|                 |                                                             |          |       |           |          |          |          |          |               |
|-----------------|-------------------------------------------------------------|----------|-------|-----------|----------|----------|----------|----------|---------------|
| 46              | Chrysoeriol (3'-Methoxy-4',5,7-trihydroxyflavone)           | C16H12O6 | 30.47 | 299.05556 | 284.0331 | 256.0378 | 227.0349 |          |               |
| 47              | Undecanedioic acid                                          | C11H20O4 | 31.32 | 215.12834 | 197.1178 | 153.1274 | 125.0957 |          |               |
| 48              | 3,3',4,4'-Tetra-O-methylellagic acid                        | C18H14O8 | 32.63 | 359.07670 | 344.0530 | 343.0465 | 329.0294 | 313.0346 | 285.0396      |
| 49              | Hydroxydodecenoic acid                                      | C12H22O3 | 32.75 | 213.14907 | 195.1386 | 183.1384 |          |          |               |
| 50              | Dimethoxy-trihydroxy(iso)flavone                            | C17H14O7 | 33.30 | 329.06613 | 314.0438 | 299.0205 | 271.0252 |          |               |
| 51              | Dodecanedioic acid                                          | C12H22O4 | 33.74 | 229.14399 | 211.1336 | 185.1538 | 167.1433 |          |               |
| 52              | Curcusone C or Curcusone D                                  | C20H24O3 | 35.45 | 313.18037 | 295.1697 | 285.1852 | 277.1586 | 267.1745 | 253.1591 [27] |
| 53              | Curcusone C or Curcusone D                                  | C20H24O3 | 35.92 | 313.18037 | 295.1696 | 285.1848 | 277.1592 | 267.1746 | 253.1592 [27] |
| 54              | 12-Oxo phytodienoic acid or 13-Epi-12-oxo phytodienoic acid | C18H28O3 | 38.18 | 291.19603 | 273.1867 | 247.2068 | 165.1275 | 150.1040 | 148.0881      |
| 55              | 12-Oxo phytodienoic acid or 13-Epi-12-oxo phytodienoic acid | C18H28O3 | 39.80 | 291.19603 | 273.1862 | 247.2076 | 165.1277 | 150.1042 | 148.0882      |
| 56              | Stearidonic acid                                            | C18H28O2 | 40.12 | 275.20111 | 257.1932 | 231.2104 | 177.1646 | 59.0125  |               |
| 57              | Hydroxyoctadecatrienoic acid                                | C18H30O3 | 40.22 | 293.21167 | 275.2023 | 235.1705 | 223.1337 | 195.1387 | 59.0124       |
| 58              | Hydroxyoctadecadienoic acid                                 | C18H32O3 | 41.33 | 295.22732 | 277.2178 | 195.1386 | 171.1018 |          |               |
| 59              | Stearidonic acid methyl ester                               | C19H30O2 | 42.09 | 291.23241 | 259.2064 | 241.1948 | 217.1955 | 135.1171 | 93.0705       |
| 60              | Hydroxyhexadecenoic acid                                    | C16H30O3 | 43.45 | 269.21167 | 251.2018 | 223.2065 |          |          |               |
| 61 <sup>1</sup> | $\alpha$ -Linolenic acid                                    | C18H30O2 | 45.05 | 277.21676 | 59.0125  |          |          |          | [28]          |
| 62              | Myristic acid                                               | C14H28O2 | 45.16 | 227.20111 |          |          |          |          | [28]          |
| 63              | 2-Hydroxyhexadecanoic acid                                  | C16H32O3 | 45.22 | 271.22732 | 253.2171 | 225.2222 | 223.2064 |          |               |
| 64 <sup>1</sup> | Linoleic acid                                               | C18H32O2 | 46.05 | 279.23241 |          |          |          |          | [28]          |
| 65              | Palmitoleic acid                                            | C16H30O2 | 46.30 | 253.21676 |          |          |          |          | [28]          |
| 66              | Palmitic acid                                               | C16H32O2 | 46.98 | 255.23241 |          |          |          |          | [28]          |
| 67 <sup>1</sup> | Oleic acid                                                  | C18H34O2 | 47.10 | 281.24806 |          |          |          |          | [28]          |
| 68              | Stearic acid                                                | C18H36O2 | 48.40 | 283.26371 |          |          |          |          | [28]          |

**Table S2.** Chemical composition of *J. curcas* stem bark (HAE).

| No.             | Name                                        | Formula   | Rt    | [M + H] <sup>+</sup> | [M - H] <sup>-</sup>   | Fragment 1 | Fragment 2 | Fragment 3 | Fragment 4 | Fragment 5 | Literature |
|-----------------|---------------------------------------------|-----------|-------|----------------------|------------------------|------------|------------|------------|------------|------------|------------|
| 1               | Scandoside methyl ester or isomer           | C17H24O11 | 15.04 |                      | 449.12951 <sup>2</sup> | 241.0718   | 223.0604   | 179.0553   | 143.0338   | 101.0231   |            |
| 2               | 5-O-Feruloylquinic acid                     | C17H20O9  | 18.55 |                      | 367.10291              | 193.0502   | 191.0556   | 173.0447   | 134.0363   | 93.0331    |            |
| 3               | Loliolide                                   | C11H16O3  | 20.09 | 197.11777            |                        | 179.1070   | 161.0963   | 135.1172   | 133.1015   | 107.0861   |            |
| 4               | Orientin (Luteolin-8-C-glucoside)           | C21H20O11 | 20.88 | 449.10839            |                        | 431.0980   | 413.0871   | 353.0664   | 329.0660   | 299.0554   | [26]       |
| 5               | Isoorientin (Luteolin-6-C-glucoside)        | C21H20O11 | 21.22 | 449.10839            |                        | 431.0981   | 413.0873   | 353.0660   | 329.0659   | 299.0554   |            |
| 6 <sup>1</sup>  | Vitexin (Apigenin-8-C-glucoside)            | C21H20O10 | 21.88 | 433.11347            |                        | 415.1028   | 397.0922   | 379.0811   | 313.0708   | 283.0604   | [26]       |
| 7               | Isovitexin (Apigenin-6-C-glucoside)         | C21H20O10 | 22.80 | 433.11347            |                        | 415.1029   | 397.0925   | 337.0710   | 313.0710   | 283.0605   |            |
| 8               | Luteolin-7-O-glucoside (Cynaroside)         | C21H20O11 | 22.89 |                      | 447.09274              | 327.0516   | 285.0412   | 284.0333   |            |            |            |
| 9               | Quercetin-O-rhamnosylpentoside              | C26H28O15 | 23.30 |                      | 579.13500              | 301.0365   | 300.0280   | 271.0253   | 255.0301   | 178.9974   |            |
| 10 <sup>1</sup> | Isoquercitrin (Quercetin-3-O-glucoside)     | C21H20O12 | 23.48 |                      | 463.08765              | 301.0358   | 300.0280   | 271.0252   | 255.0299   | 178.9983   |            |
| 11 <sup>1</sup> | Rutin (Quercetin-3-O-rutinoside)            | C27H30O16 | 23.58 | 611.16122            |                        | 303.0501   | 129.0549   | 85.0290    | 71.0498    |            |            |
| 12              | Tomatidine or isomer                        | C27H45NO2 | 24.45 | 416.35286            |                        | 398.3424   | 273.2217   | 255.2111   | 161.1327   | 126.1280   |            |
| 13              | Di-O-caffeoylquinic acid                    | C25H24O12 | 24.63 |                      | 515.11896              | 353.0882   | 335.0785   | 191.0555   | 179.0342   | 173.0446   |            |
| 14 <sup>1</sup> | Quercitrin (Quercetin-3-O-rhamnoside)       | C21H20O11 | 25.03 |                      | 447.09274              | 301.0359   | 300.0281   | 271.0253   | 255.0302   | 151.0026   |            |
| 15              | Kaempferol-O-rhamnosylpentoside             | C26H28O14 | 25.07 |                      | 563.14009              | 285.0410   | 284.0331   | 255.0301   | 227.0347   | 151.0025   |            |
| 16              | Dihydroactinidiolide                        | C11H16O2  | 27.09 | 181.12286            |                        | 163.1119   | 145.1016   | 135.1172   | 121.1015   | 107.0860   |            |
| 17 <sup>1</sup> | Quercetin (3,3',4',5,7-Pentahydroxyflavone) | C15H10O7  | 27.57 |                      | 301.03483              | 273.0418   | 178.9979   | 151.0027   | 121.0281   | 107.0126   |            |
| 18              | Jasmonic acid                               | C12H18O3  | 28.21 |                      | 209.11777              | 165.1276   | 109.0645   | 59.0124    |            |            |            |
| 19              | Sebacic acid (Decanedioic acid)             | C10H18O4  | 28.44 |                      | 201.11268              | 183.1021   | 157.1223   | 139.1118   | 137.0960   | 111.0804   |            |
| 20 <sup>1</sup> | Luteolin (3',4',5,7-Tetrahydroxyflavone)    | C15H10O6  | 28.45 |                      | 285.03991              | 217.0503   | 199.0390   | 175.0390   | 151.0025   | 133.0283   |            |
| 21              | Quercetin-3-O-methyl ether                  | C16H12O7  | 28.80 |                      | 315.05048              | 300.0280   | 271.0252   | 255.0301   | 243.0302   |            |            |
| 22              | Solasodine or isomer                        | C27H43NO2 | 29.16 | 414.33721            |                        | 396.3268   | 271.2066   | 253.1954   | 157.1013   | 126.1280   |            |
| 23 <sup>1</sup> | Apigenin (4',5,7-Trihydroxyflavone)         | C15H10O5  | 30.29 |                      | 269.04500              | 227.0340   | 225.0542   | 151.0030   | 149.0231   | 117.0333   | [26]       |
| 24              | Undecanedioic acid                          | C11H20O4  | 31.33 |                      | 215.12834              | 197.1179   | 153.1275   | 125.0958   |            |            |            |
| 25              | Hydroxydodecenoic acid                      | C12H22O3  | 32.76 |                      | 213.14907              | 195.1386   | 183.1385   |            |            |            |            |

|                 |                                                             |           |       |           |          |          |          |          |              |
|-----------------|-------------------------------------------------------------|-----------|-------|-----------|----------|----------|----------|----------|--------------|
| 26              | Dimethoxy-trihydroxy(iso)flavone                            | C17H14O7  | 33.33 | 329.06613 | 314.0438 | 299.0203 | 271.0255 |          |              |
| 27              | Dodecanedioic acid                                          | C12H22O4  | 33.76 | 229.14399 | 211.1334 | 185.1538 | 167.1431 |          |              |
| 28              | Unidentified saponin 1                                      | C42H66O15 | 34.36 | 809.43235 | 527.3411 | 485.3279 | 355.2655 |          |              |
| 29              | Trihydroxyoctadecenoic acid                                 | C18H34O5  | 35.46 | 329.23280 | 311.2230 | 293.2132 | 275.2021 | 201.1129 | 171.1018     |
| 30              | Unidentified saponin 2                                      | C42H66O15 | 35.73 | 809.43235 | 647.3827 | 471.3482 | 453.3384 | 113.0231 |              |
| 31              | Cynarasaponin C or isomer                                   | C42H66O14 | 37.64 | 793.43744 | 631.3851 | 587.3920 | 569.3859 | 497.3664 | 455.3532     |
| 32              | 12-Oxo phytodienoic acid or 13-Epi-12-oxo phytodienoic acid | C18H28O3  | 38.20 | 291.19603 | 273.1861 | 247.2069 | 165.1273 |          |              |
| 33              | 12-Oxo phytodienoic acid or 13-Epi-12-oxo phytodienoic acid | C18H28O3  | 39.79 | 291.19603 | 273.1872 | 247.2064 | 165.1276 |          |              |
| 34              | Stearidonic acid                                            | C18H28O2  | 40.11 | 275.20111 | 257.1935 | 231.2121 | 177.1646 | 59.0125  |              |
| 35              | Hydroxyoctadecatrienoic acid                                | C18H30O3  | 40.20 | 293.21167 | 275.2025 | 235.1703 | 223.1335 | 195.1387 | 59.0125      |
| 36              | Hexadecanedioic acid                                        | C16H30O4  | 40.73 | 285.20659 | 267.1968 | 223.2066 |          |          |              |
| 37              | Hydroxyoctadecadienoic acid                                 | C18H32O3  | 41.37 | 295.22732 | 277.2178 | 195.1388 | 171.1017 |          |              |
| 38 <sup>1</sup> | $\alpha$ -Linolenic acid                                    | C18H30O2  | 45.07 | 277.21676 | 59.0122  |          |          |          | [28]         |
| 39 <sup>1</sup> | Linoleic acid                                               | C18H32O2  | 46.06 | 279.23241 |          |          |          |          | [28]         |
| 40              | Palmitic acid                                               | C16H32O2  | 46.99 | 255.23241 |          |          |          |          | [28]         |
| 41 <sup>1</sup> | Oleic acid                                                  | C18H34O2  | 47.11 | 281.24806 |          |          |          |          | [28]         |
| 42              | Stearic acid                                                | C18H36O2  | 48.41 | 283.26371 |          |          |          |          | [28]         |
| 43              | Taraxasterol or isomer                                      | C30H50O   | 50.86 | 427.39399 | 409.3841 | 369.3524 | 289.2495 | 229.1951 | 81.0706 [29] |
| 44              | Taraxasterol or isomer                                      | C30H50O   | 53.00 | 427.39399 | 409.3834 | 299.2737 | 217.1965 | 205.1948 | 95.0862 [29] |

**Table S3.** Chemical composition of *J. gossypifolia* leaves (HAE).

| No.             | Name                                                    | Formula   | Rt    | [M + H] <sup>+</sup> | [M - H] <sup>-</sup> | Fragment<br>1 | Fragment<br>2 | Fragment<br>3 | Fragment<br>4 | Fragment<br>5 | Literature |
|-----------------|---------------------------------------------------------|-----------|-------|----------------------|----------------------|---------------|---------------|---------------|---------------|---------------|------------|
| 1               | Quinic acid                                             | C7H12O6   | 1.95  |                      | 191.05557            | 173.0446      | 171.0289      | 127.0389      | 111.0074      | 85.028        |            |
| 2 <sup>1</sup>  | Catechin                                                | C15H14O6  | 14.20 |                      | 289.07121            | 245.0818      | 205.0501      | 203.0708      | 151.0390      | 109.0282      | [28]       |
| 3               | Kynurenic acid                                          | C10H7NO3  | 14.24 | 190.05042            |                      | 162.0552      | 144.0446      | 116.0502      | 89.0394       |               |            |
| 4               | Bergenin                                                | C14H16O9  | 14.56 |                      | 327.07161            | 312.0499      | 249.0409      | 234.0171      | 207.0297      | 192.0059      |            |
| 5               | Biflorin                                                | C16H18O9  | 15.08 | 355.10291            |                      | 337.0929      | 319.0815      | 259.0606      | 235.0605      | 205.0500      |            |
| 6               | Isobiflorin                                             | C16H18O9  | 15.86 | 355.10291            |                      | 337.0944      | 319.0806      | 259.0605      | 235.0605      | 205.0499      |            |
| 7 <sup>1</sup>  | Epiatechin                                              | C15H14O6  | 17.63 |                      | 289.07121            | 245.0818      | 205.0496      | 203.0705      | 151.0391      | 109.0282      |            |
| 8 <sup>1</sup>  | 4-Coumaric acid                                         | C9H8O3    | 18.63 |                      | 163.03952            | 119.0489      | 93.0331       |               |               |               | [28]       |
| 9               | Isololiolide                                            | C11H16O3  | 18.78 | 197.11777            |                      | 179.1069      | 161.0962      | 135.1171      | 133.1015      | 107.0860      |            |
| 10 <sup>1</sup> | Scopoletin (7-Hydroxy-6-methoxycoumarin)                | C10H8O4   | 19.13 | 193.05009            |                      | 178.0263      | 165.0549      | 149.0600      | 137.0601      | 133.0288      |            |
| 11              | Isoschaftoside (Apigenin-6-C-arabinoside-8-C-glucoside) | C26H28O14 | 19.44 | 565.15574            |                      | 547.1419      | 511.1246      | 427.1036      | 409.0935      | 295.0605      | [26]       |
| 12              | Schaftoside (Apigenin-8-C-arabinoside-6-C-glucoside)    | C26H28O14 | 19.78 | 565.15574            |                      | 547.1456      | 511.1252      | 409.0931      | 379.0815      | 295.0605      | [26]       |
| 13              | Luteolin-C-hexoside-C-pentoside isomer 1                | C26H28O15 | 19.89 |                      | 579.13500            | 489.1032      | 459.0946      | 399.0727      | 369.0622      | 339.0505      |            |
| 14 <sup>1</sup> | Taxifolin (Dihydroquercetin)                            | C15H12O7  | 19.94 |                      | 303.05048            | 285.0410      | 199.0397      | 177.0187      | 151.0386      | 125.0231      |            |
| 15 <sup>1</sup> | Ferulic acid                                            | C10H10O4  | 19.98 |                      | 193.05009            | 178.0264      | 149.0597      | 137.0236      | 134.0362      | 121.0285      | [28]       |
| 16              | Luteolin-C-hexoside-C-pentoside isomer 2                | C26H28O15 | 20.05 |                      | 579.13500            | 489.1046      | 459.0950      | 399.0722      | 369.0619      | 339.0517      |            |
| 17              | Loliolide                                               | C11H16O3  | 20.07 | 197.11777            |                      | 179.1069      | 161.0963      | 135.1171      | 133.1015      | 107.0860      |            |
| 18              | Vicenin-1 (Apigenin-8-C-glucoside-6-C-xyloside)         | C26H28O14 | 20.73 | 565.15574            |                      | 547.1447      | 529.1350      | 511.1252      | 427.1034      | 295.0608      |            |
| 19              | Orientin (Luteolin-8-C-glucoside)                       | C21H20O11 | 20.83 | 449.10839            |                      | 431.0983      | 413.0875      | 353.0661      | 329.0662      | 299.0557      | [26]       |
| 20              | Vicenin-3 (Apigenin-6-C-glucoside-8-C-xyloside)         | C26H28O14 | 21.10 | 565.15574            |                      | 547.1465      | 529.1361      | 511.1252      | 379.0815      | 295.0605      |            |
| 21              | Isoorientin (Luteolin-6-C-glucoside)                    | C21H20O11 | 21.17 | 449.10839            |                      | 431.0976      | 413.0881      | 353.0660      | 329.0659      | 299.0555      | [26]       |
| 22 <sup>1</sup> | Vitexin (Apigenin-8-C-glucoside)                        | C21H20O10 | 21.83 | 433.11347            |                      | 415.1032      | 397.0926      | 379.0819      | 313.0710      | 283.0606      | [26]       |
| 23              | Dihydrokaempferol (3,4',5,7-Tetrahydroxyflavanone)      | C15H12O6  | 22.51 |                      | 287.05557            | 269.0456      | 259.0614      | 177.0549      | 151.0027      | 125.0231      |            |
| 24              | Luteolin-C-pentoside                                    | C20H18O10 | 22.56 | 419.09783            |                      | 401.0870      | 383.0767      | 365.0663      | 329.0660      | 299.0555      |            |
| 25              | Isovitexin (Apigenin-6-C-glucoside)                     | C21H20O10 | 22.75 | 433.11347            |                      | 415.1038      | 397.0927      | 337.0711      | 313.0710      | 283.0606      | [26]       |
| 26              | Luteolin-7-O-glucoside (Cynaroside)                     | C21H20O11 | 22.91 |                      | 447.09274            | 327.0513      | 285.0411      | 284.0332      | 256.0380      | 151.0027      |            |

|                 |                                                                                 |           |       |           |          |          |          |          |          |      |
|-----------------|---------------------------------------------------------------------------------|-----------|-------|-----------|----------|----------|----------|----------|----------|------|
| 27              | Scoparin (Chrysoeriol-8-C-glucoside) or Isoscoparin (Chrysoeriol-6-C-glucoside) | C22H22O11 | 23.20 | 463.12404 | 445.1133 | 427.1027 | 367.0818 | 343.0818 | 313.0710 |      |
| 28 <sup>1</sup> | Isoquercitrin (Quercetin-3-O-glucoside)                                         | C21H20O12 | 23.47 | 463.08765 | 301.0360 | 300.0281 | 271.0254 | 255.0301 | 178.9978 |      |
| 29              | Apigenin-C-rhamnoside isomer 1                                                  | C21H20O9  | 23.62 | 417.11856 | 399.1084 | 381.0974 | 321.0759 | 297.0762 | 267.0655 |      |
| 30              | Apigenin-C-pentoside isomer 1                                                   | C20H18O9  | 24.24 | 403.10291 | 385.0928 | 367.0817 | 349.0707 | 313.0710 | 283.0606 |      |
| 31              | Apigenin-C-pentoside isomer 2                                                   | C20H18O9  | 24.91 | 403.10291 | 385.0928 | 367.0820 | 337.0714 | 313.0709 | 283.0606 |      |
| 32              | Rhoifolin (Apigenin-7-O-neohesperidoside)                                       | C27H30O14 | 24.95 | 577.15574 | 413.0879 | 269.0459 | 268.0381 | 117.0333 |          |      |
| 33 <sup>1</sup> | Eriodictyol (3',4',5,7-Tetrahydroxyflavanone)                                   | C15H12O6  | 25.42 | 287.05556 | 151.0026 | 135.0440 | 125.0231 | 107.0125 | 83.0123  |      |
| 34              | Apigenin-C-rhamnoside isomer 2                                                  | C21H20O9  | 26.19 | 417.11856 | 399.1076 | 381.0972 | 321.0762 | 297.0761 | 267.0654 |      |
| 35              | Dihydroactinidiolide                                                            | C11H16O2  | 27.08 | 181.12286 | 163.1120 | 145.1015 | 135.1172 | 121.1016 | 107.0861 |      |
| 36              | Dihydroxy-dimethoxy(iso)flavone-C-hexoside                                      | C23H24O11 | 27.31 | 477.13969 | 445.1131 | 427.1029 | 409.0924 | 325.0709 | 295.0604 |      |
| 37 <sup>1</sup> | Quercetin (3,3',4',5,7-Pentahydroxyflavone)                                     | C15H10O7  | 27.57 | 301.03483 | 273.0410 | 178.9978 | 151.0026 | 121.0282 | 107.0126 | [28] |
| 38 <sup>1</sup> | Naringenin (4',5,7-Trihydroxyflavanone)                                         | C15H12O5  | 27.75 | 271.06065 | 177.0184 | 165.0181 | 151.0027 | 119.0490 | 107.0126 |      |
| 39              | Jasmonic acid                                                                   | C12H18O3  | 28.20 | 209.11777 | 165.1267 | 109.0643 | 59.0123  |          |          |      |
| 40              | Jatrophanol I or II or II                                                       | C43H40O20 | 28.31 | 875.20347 | 443.0990 | 431.0989 | 323.0567 | 311.0569 | 295.0616 |      |
| 41 <sup>1</sup> | Luteolin (3',4',5,7-Tetrahydroxyflavone)                                        | C15H10O6  | 28.44 | 285.03991 | 217.0504 | 199.0396 | 175.0392 | 151.0026 | 133.0283 | [28] |
| 42              | Sebacic acid (Decanedioic acid)                                                 | C10H18O4  | 28.45 | 201.11268 | 183.1021 | 157.1225 | 139.1117 | 137.0961 | 111.0803 |      |
| 43              | Quercetin-3-O-methyl ether                                                      | C16H12O7  | 28.80 | 315.05048 | 300.0281 | 271.0253 | 255.0301 | 243.0300 | 227.0344 |      |
| 44              | Dimethoxy-tetrahydroxy(iso)flavone                                              | C17H14O8  | 29.05 | 345.06105 | 330.0388 | 315.0154 | 287.0204 | 271.0253 | 259.0251 |      |
| 45 <sup>1</sup> | Kaempferol (3,4',5,7-Tetrahydroxyflavone)                                       | C15H10O6  | 29.92 | 285.03991 | 257.0458 | 229.0503 | 185.0603 | 151.0025 | 107.0124 | [28] |
| 46 <sup>1</sup> | Apigenin (4',5,7-Trihydroxyflavone)                                             | C15H10O5  | 30.27 | 269.04500 | 227.0351 | 225.0555 | 151.0027 | 149.0235 | 117.0333 | [26] |
| 47              | Jatrophanol I or II or II                                                       | C43H40O20 | 30.32 | 875.20347 | 713.181  | 443.0991 | 431.0990 | 323.0566 | 311.0568 |      |
| 48 <sup>1</sup> | Isorhamnetin (3'-Methoxy-3,4',5,7-tetrahydroxyflavone)                          | C16H12O7  | 30.42 | 315.05048 | 300.0280 | 283.0258 | 271.0253 | 164.0103 | 151.0027 |      |
| 49              | Chrysoeriol (3'-Methoxy-4',5,7-trihydroxyflavone)                               | C16H12O6  | 30.52 | 299.05556 | 284.0331 | 256.0380 | 227.0340 | 151.0023 | 107.0128 |      |
| 50              | Methoxy-tetrahydroxy(iso)flavone                                                | C16H12O6  | 30.93 | 299.05556 | 284.0332 | 256.0378 | 255.0301 | 227.0348 |          |      |
| 51              | Trihydroxy-trimethoxy(iso)flavone isomer 1                                      | C18H16O8  | 31.09 | 359.07670 | 344.0542 | 329.0308 | 301.0358 | 286.0125 | 273.0410 |      |
| 52              | Dimethoxy-trihydroxy(iso)flavone                                                | C17H14O7  | 31.15 | 329.06613 | 314.0439 | 299.0200 | 285.0411 | 271.0254 | 243.0299 |      |
| 53              | Undecanedioic acid                                                              | C11H20O4  | 31.32 | 215.12834 | 197.1179 | 153.1275 | 125.0956 |          |          |      |
| 54              | Trihydroxy-trimethoxy(iso)flavone isomer 2                                      | C18H16O8  | 31.74 | 359.07670 | 344.0542 | 329.0308 | 314.0073 | 301.0360 | 286.0126 |      |
| 55              | Sakuranetin (4',5-Dihydroxy-7-methoxyflavanone)                                 | C16H14O5  | 32.54 | 287.09195 | 269.0805 | 185.0444 | 167.0342 | 147.0443 | 119.0496 |      |



|                 |                                                             |          |       |           |          |          |          |          |          |
|-----------------|-------------------------------------------------------------|----------|-------|-----------|----------|----------|----------|----------|----------|
| 56              | Hydroxydodecenoic acid                                      | C12H22O3 | 32.77 | 213.14907 | 195.1384 | 183.1384 |          |          |          |
| 57              | Trihydroxy-trimethoxy(iso)flavone isomer 3                  | C18H16O8 | 33.15 | 359.07670 | 344.0542 | 329.0309 | 314.0075 | 301.0360 | 286.0125 |
| 58              | Trihydroxy-trimethoxy(iso)flavone isomer 4                  | C18H16O8 | 33.56 | 359.07670 | 344.0543 | 329.0309 | 315.0512 | 301.0359 | 286.0125 |
| 59              | Dodecanedioic acid                                          | C12H22O4 | 33.75 | 229.14399 | 211.1336 | 185.1541 | 167.1432 |          |          |
| 60              | Dihydroxy-tetramethoxy(iso)flavone isomer 1                 | C19H18O8 | 33.85 | 375.10799 | 360.0845 | 359.0772 | 345.0609 | 329.0657 | 313.0350 |
| 61              | Dihydroxy-tetramethoxy(iso)flavone isomer 2                 | C19H18O8 | 35.45 | 375.10799 | 360.0844 | 359.0766 | 345.0610 | 327.0511 | 314.0426 |
| 62              | Hydroxy-tetramethoxy(iso)flavone                            | C19H18O7 | 37.04 | 359.11308 | 344.0895 | 343.0816 | 329.0663 | 315.0866 | 301.0713 |
| 63              | Pinostrobin (5-Hydroxy-7-methoxyflavanone)                  | C16H14O4 | 37.08 | 271.09704 | 173.0595 | 167.0342 | 165.0551 | 131.0495 | 103.0549 |
| 64              | Tetradecanedioic acid                                       | C14H26O4 | 37.67 | 257.17529 | 239.1652 | 195.1750 | 193.1005 |          |          |
| 65              | 12-Oxo phytodienoic acid or 13-Epi-12-oxo phytodienoic acid | C18H28O3 | 38.21 | 291.19603 | 273.1873 | 247.2068 | 165.1276 | 150.1040 | 148.0882 |
| 66              | 12-Oxo phytodienoic acid or 13-Epi-12-oxo phytodienoic acid | C18H28O3 | 39.81 | 291.19603 | 273.1863 | 247.2063 | 165.1273 | 150.1042 | 148.0882 |
| 67              | Stearidonic acid                                            | C18H28O2 | 40.13 | 275.20111 | 257.1918 | 231.2115 | 177.1638 | 59.0123  |          |
| 68              | Hydroxyoctadecatrienoic acid                                | C18H30O3 | 40.22 | 293.21167 | 275.2023 | 235.1702 | 223.1341 | 195.1385 | 59.0125  |
| 69              | Hydroxyoctadecadienoic acid                                 | C18H32O3 | 41.36 | 295.22732 | 277.2178 | 195.1387 | 171.1018 |          |          |
| 70              | Stearidonic acid methyl ester                               | C19H30O2 | 42.11 | 291.23241 | 259.2069 | 241.1952 | 217.1946 | 135.1172 | 93.0705  |
| 71              | Hydroxyhexadecenoic acid                                    | C16H30O3 | 43.46 | 269.21167 | 251.2010 | 223.2065 |          |          |          |
| 72 <sup>1</sup> | $\alpha$ -Linolenic acid                                    | C18H30O2 | 45.06 | 277.21676 | 59.0127  |          |          |          |          |
| 73              | 2-Hydroxyhexadecanoic acid                                  | C16H32O3 | 45.21 | 271.22732 | 253.2172 | 225.2222 | 223.2060 |          |          |
| 74 <sup>1</sup> | Linoleic acid                                               | C18H32O2 | 46.06 | 279.23241 |          |          |          |          |          |
| 75              | Palmitoleic acid                                            | C16H30O2 | 46.28 | 253.21676 |          |          |          |          |          |
| 76              | Palmitic acid                                               | C16H32O2 | 46.99 | 255.23241 |          |          |          |          |          |
| 77 <sup>1</sup> | Oleic acid                                                  | C18H34O2 | 47.09 | 281.24806 |          |          |          |          |          |
| 78              | Stearic acid                                                | C18H36O2 | 48.38 | 283.26371 |          |          |          |          |          |
